# Supplementary material
Source: publisher figshare collection journal article supplement (https://acs.figshare.com/ndownloader/files/5759526)
Supplement: Supplementary file 1 [file 5759526]

# ja9807439.cif

data_peptide1 
 
_audit_creation_method            SHELXL 
_chemical_name_systematic 
; 
 [Piv-S-Pro-(2R,3R)-2,3-methanophenylalanine-NHMe] dichloromethane solvate 
; 
_chemical_name_common             ? 
_chemical_formula_moiety          ? 
_chemical_formula_structural      ? 
_chemical_formula_analytical      ? 
_chemical_formula_sum             'C21 H29 N3 O3 . C H2 Cl2' 
_chemical_formula_weight          456.40 
_chemical_melting_point           ? 
_chemical_compound_source         ? 
 
loop_ 
 _atom_type_symbol 
 _atom_type_description 
 _atom_type_scat_dispersion_real 
 _atom_type_scat_dispersion_imag 
 _atom_type_scat_source 
 'O'  'O'    .0492    .0322 
 'International Tables Vol C Tables 4.2.6.8 and 6.1.1.4' 
 'N'  'N'    .0311    .0180 
 'International Tables Vol C Tables 4.2.6.8 and 6.1.1.4' 
 'C'  'C'    .0181    .0091 
 'International Tables Vol C Tables 4.2.6.8 and 6.1.1.4' 
 'H'  'H'    .0000    .0000 
 'International Tables Vol C Tables 4.2.6.8 and 6.1.1.4' 
 'Cl'  'Cl'    .3639    .7018 
 'International Tables Vol C Tables 4.2.6.8 and 6.1.1.4' 
 
_symmetry_cell_setting            Orthorhombic 
_symmetry_space_group_name_H-M    P212121 
 
loop_ 
 _symmetry_equiv_pos_as_xyz 
 'x, y, z' 
 '-x+1/2, -y, z+1/2' 
 'x+1/2, -y+1/2, -z' 
 '-x, y+1/2, -z+1/2' 
 
_cell_length_a                    9.5420(10) 
_cell_length_b                    9.918(2) 
_cell_length_c                    26.268(6) 
_cell_angle_alpha                 90.00 
_cell_angle_beta                  90.00 
_cell_angle_gamma                 90.00 
_cell_volume                      2485.9(8) 
_cell_formula_units_Z             4 
_cell_measurement_temperature     293(2) 
_cell_measurement_reflns_used     25 
_cell_measurement_theta_min       20 
_cell_measurement_theta_max       30 
 
_exptl_crystal_description        'Transparent prism' 
_exptl_crystal_colour             Colourless 
_exptl_crystal_size_max           ? 
_exptl_crystal_size_mid           ? 
_exptl_crystal_size_min           ? 
_exptl_crystal_density_meas       ? 
_exptl_crystal_density_diffrn     1.219 
_exptl_crystal_density_method     ? 
_exptl_crystal_F_000              968 
_exptl_absorpt_coefficient_mu     2.560 
_exptl_absorpt_correction_type    none 
_exptl_absorpt_correction_T_min   ? 
_exptl_absorpt_correction_T_max   ? 
 
_exptl_special_details 
; 
 ? 
; 
 
_diffrn_ambient_temperature       293(2) 
_diffrn_radiation_wavelength      1.54180 
_diffrn_radiation_type            CuK\a 
_diffrn_radiation_source          'fine-focus sealed tube' 
_diffrn_radiation_monochromator   graphite 
_diffrn_measurement_device        'Nonius CAD-4 four circle diffractometer' 
_diffrn_measurement_method        \w/2\q
_diffrn_standards_number          3 
_diffrn_standards_interval_count  ? 
_diffrn_standards_interval_time   90 
_diffrn_standards_decay_%         0 
_diffrn_reflns_number             2550 
_diffrn_reflns_av_R_equivalents   0.0792 
_diffrn_reflns_av_sigmaI/netI     0.0215 
_diffrn_reflns_limit_h_min        0 
_diffrn_reflns_limit_h_max        11 
_diffrn_reflns_limit_k_min        -2 
_diffrn_reflns_limit_k_max        11 
_diffrn_reflns_limit_l_min        0 
_diffrn_reflns_limit_l_max        31 
_diffrn_reflns_theta_min          3.36 
_diffrn_reflns_theta_max          69.78 
_reflns_number_total              2499 
_reflns_number_observed           1618 
_reflns_observed_criterion        >2sigma(I) 
 
_computing_data_collection        ? 
_computing_cell_refinement        ? 
_computing_data_reduction         ? 
_computing_structure_solution     'SIR92' 
_computing_structure_refinement   'SHELXL-93 (Sheldrick, 1993)' 
_computing_molecular_graphics     ? 
_computing_publication_material   SHELXL-93 
 
_refine_special_details 
; 
 Refinement on F^2^ for ALL reflections except for 50 with very negative F^2^ 
 or flagged by the user for potential systematic errors.  Weighted R-factors 
 wR and all goodnesses of fit S are based on F^2^, conventional R-factors R 
 are based on F, with F set to zero for negative F^2^. The observed criterion 
 of F^2^ > 2sigma(F^2^) is used only for calculating _R_factor_obs etc. and is 
 not relevant to the choice of reflections for refinement.  R-factors based 
 on F^2^ are statistically about twice as large as those based on F, and R- 
 factors based on ALL data will be even larger. 
; 
 
_refine_ls_structure_factor_coef  Fsqd  
_refine_ls_matrix_type            full 
_refine_ls_weighting_scheme 
 'calc w=1/[s^2^(Fo^2^)+( 0.1091P)^2^+0.4434P] where P=(Fo^2^+2Fc^2^)/3' 
_atom_sites_solution_primary      direct 
_atom_sites_solution_secondary    difmap 
_atom_sites_solution_hydrogens    geom 
_refine_ls_hydrogen_treatment     ? 
_refine_ls_extinction_method      SHELXL 
_refine_ls_extinction_coef        0.0017(5) 
_refine_ls_extinction_expression 
 'Fc^*^=kFc[1+0.001xFc^2^l^3^/sin(2q)]^-1/4^' 
_refine_ls_abs_structure_details 
 'Flack H D (1983), Acta Cryst. A39, 876-881' 
_refine_ls_abs_structure_Flack    0.09(4) 
_refine_ls_number_reflns          2449 
_refine_ls_number_parameters      279 
_refine_ls_number_restraints      2 
_refine_ls_R_factor_all           0.0910 
_refine_ls_R_factor_obs           0.0545 
_refine_ls_wR_factor_all          0.1926 
_refine_ls_wR_factor_obs          0.1387 
_refine_ls_goodness_of_fit_all    0.962 
_refine_ls_goodness_of_fit_obs    1.001 
_refine_ls_restrained_S_all       1.100 
_refine_ls_restrained_S_obs       1.000 
_refine_ls_shift/esd_max          0.352 
_refine_ls_shift/esd_mean         0.039 
 
loop_ 
 _atom_site_label 
 _atom_site_type_symbol 
 _atom_site_fract_x 
 _atom_site_fract_y 
 _atom_site_fract_z 
 _atom_site_U_iso_or_equiv 
 _atom_site_thermal_displace_type 
 _atom_site_occupancy 
 _atom_site_calc_flag 
 _atom_site_refinement_flags 
 _atom_site_disorder_group 
Cl1 Cl 0.8797(2) 0.6961(2) -0.12475(12) 0.1490(11) Uani 1 d . . 
Cl2 Cl 1.0378(3) 0.5176(3) -0.06025(8) 0.1592(11) Uani 1 d . . 
O1 O 0.0427(4) 0.0660(4) -0.12157(13) 0.0713(9) Uani 1 d . . 
O2 O -0.2160(4) 0.2896(3) -0.12971(13) 0.0802(11) Uani 1 d . . 
O3 O 0.0983(4) 0.4496(4) -0.24510(14) 0.0875(11) Uani 1 d . . 
N1 N -0.1656(4) 0.0330(4) -0.08680(13) 0.0636(10) Uani 1 d . . 
N2 N -0.1551(4) 0.1974(4) -0.20582(13) 0.0555(9) Uani 1 d D . 
N3 N 0.1227(4) 0.2666(4) -0.1960(2) 0.0702(11) Uani 1 d D . 
H2 H -0.1379(82) 0.1052(35) -0.2223(25) 0.142(5) Uiso 1 d D . 
H3 H 0.0679(74) 0.1829(51) -0.1836(26) 0.142(5) Uiso 1 d D . 
C1 C 0.0537(9) -0.1057(6) -0.0120(2) 0.103(2) Uani 1 d . . 
H11 H -0.0405(9) -0.1364(6) -0.0065(2) 0.142(5) Uiso 1 calc R . 
H12 H 0.1051(9) -0.1104(6) 0.0194(2) 0.142(5) Uiso 1 calc R . 
H13 H 0.0982(9) -0.1619(6) -0.0370(2) 0.142(5) Uiso 1 calc R . 
C2 C 0.2014(7) 0.0901(9) -0.0400(3) 0.119(3) Uani 1 d . . 
H21 H 0.1986(7) 0.1816(9) -0.0519(3) 0.142(5) Uiso 1 calc R . 
H22 H 0.2462(7) 0.0344(9) -0.0651(3) 0.142(5) Uiso 1 calc R . 
H23 H 0.2534(7) 0.0860(9) -0.0087(3) 0.142(5) Uiso 1 calc R . 
C3 C -0.0181(9) 0.1343(7) 0.0089(2) 0.114(2) Uani 1 d . . 
H31 H -0.0177(9) 0.2250(7) -0.0038(2) 0.142(5) Uiso 1 calc R . 
H32 H 0.0335(9) 0.1304(7) 0.0402(2) 0.142(5) Uiso 1 calc R . 
H33 H -0.1130(9) 0.1061(7) 0.0148(2) 0.142(5) Uiso 1 calc R . 
C4 C 0.0511(6) 0.0394(6) -0.0308(2) 0.0778(15) Uani 1 d . . 
C5 C -0.0277(6) 0.0468(5) -0.0824(2) 0.0634(12) Uani 1 d . . 
C6 C -0.2717(6) 0.0040(7) -0.0478(2) 0.087(2) Uani 1 d . . 
H61 H -0.2962(6) 0.0847(7) -0.0289(2) 0.142(5) Uiso 1 calc R . 
H62 H -0.2388(6) -0.0642(7) -0.0241(2) 0.142(5) Uiso 1 calc R . 
C7 C -0.3927(7) -0.0460(9) -0.0778(2) 0.111(2) Uani 1 d . . 
H71 H -0.4800(7) -0.0280(9) -0.0601(2) 0.142(5) Uiso 1 calc R . 
H72 H -0.3849(7) -0.1422(9) -0.0836(2) 0.142(5) Uiso 1 calc R . 
C8 C -0.3870(6) 0.0295(7) -0.1271(2) 0.092(2) Uani 1 d . . 
H81 H -0.4342(6) 0.1158(7) -0.1242(2) 0.142(5) Uiso 1 calc R . 
H82 H -0.4305(6) -0.0220(7) -0.1542(2) 0.142(5) Uiso 1 calc R . 
C9 C -0.2293(5) 0.0493(5) -0.1374(2) 0.0640(12) Uani 1 d . . 
H9 H -0.1943(5) -0.0194(5) -0.1610(2) 0.142(5) Uiso 1 calc R . 
C10 C -0.1985(5) 0.1912(5) -0.1575(2) 0.0586(11) Uani 1 d . . 
C11 C 0.2694(7) 0.2882(8) -0.1849(3) 0.106(2) Uani 1 d . . 
H111 H 0.3036(7) 0.2160(8) -0.1640(3) 0.142(5) Uiso 1 calc R . 
H112 H 0.2805(7) 0.3723(8) -0.1673(3) 0.142(5) Uiso 1 calc R . 
H113 H 0.3214(7) 0.2907(8) -0.2162(3) 0.142(5) Uiso 1 calc R . 
C12 C 0.0476(5) 0.3497(5) -0.2242(2) 0.0633(12) Uani 1 d . . 
C13 C -0.1063(5) 0.3198(4) -0.2292(2) 0.0560(11) Uani 1 d . . 
C14 C -0.2012(6) 0.4393(5) -0.2302(2) 0.0747(14) Uani 1 d . . 
H141 H -0.1599(6) 0.5411(5) -0.2264(2) 0.142(5) Uiso 1 d R . 
H142 H -0.2943(6) 0.4211(5) -0.2108(2) 0.142(5) Uiso 1 d R . 
C15 C -0.1769(6) 0.3646(5) -0.2789(2) 0.0692(13) Uani 1 d . . 
H151 H -0.1036(6) 0.4214(5) -0.3012(2) 0.142(5) Uiso 1 d R . 
C16 C -0.2859(5) 0.2810(5) -0.3041(2) 0.0664(13) Uani 1 d . . 
C17 C -0.4049(7) 0.2383(7) -0.2812(3) 0.098(2) Uani 1 d . . 
H171 H -0.4216(7) 0.2624(7) -0.2476(3) 0.142(5) Uiso 1 calc R . 
C18 C -0.5012(8) 0.1610(8) -0.3061(3) 0.117(2) Uani 1 d . . 
H181 H -0.5818(8) 0.1341(8) -0.2890(3) 0.142(5) Uiso 1 calc R . 
C19 C -0.4826(9) 0.1230(8) -0.3545(4) 0.116(2) Uani 1 d . . 
H191 H -0.5472(9) 0.0681(8) -0.3711(4) 0.142(5) Uiso 1 calc R . 
C20 C -0.3655(9) 0.1679(11) -0.3784(3) 0.132(3) Uani 1 d . . 
H201 H -0.3501(9) 0.1432(11) -0.4121(3) 0.142(5) Uiso 1 calc R . 
C21 C -0.2684(7) 0.2487(8) -0.3544(2) 0.096(2) Uani 1 d . . 
H211 H -0.1914(7) 0.2812(8) -0.3722(2) 0.142(5) Uiso 1 calc R . 
C22 C 0.9703(8) 0.5444(6) -0.1191(3) 0.101(2) Uani 1 d . . 
H221 H 0.9074(8) 0.4709(6) -0.1274(3) 0.142(5) Uiso 1 calc R . 
H222 H 1.0461(8) 0.5434(6) -0.1437(3) 0.142(5) Uiso 1 calc R . 
 
loop_ 
 _atom_site_aniso_label 
 _atom_site_aniso_U_11 
 _atom_site_aniso_U_22 
 _atom_site_aniso_U_33 
 _atom_site_aniso_U_23 
 _atom_site_aniso_U_13 
 _atom_site_aniso_U_12 
Cl1 0.1054(13) 0.0911(12) 0.250(3) -0.031(2) -0.042(2) 0.0186(11) 
Cl2 0.188(2) 0.161(2) 0.128(2) 0.0380(14) -0.054(2) -0.050(2) 
O1 0.060(2) 0.080(2) 0.074(2) 0.010(2) 0.009(2) 0.001(2) 
O2 0.104(3) 0.063(2) 0.075(2) -0.010(2) 0.024(2) -0.008(2) 
O3 0.086(2) 0.074(2) 0.103(3) 0.022(2) -0.003(2) -0.029(2) 
N1 0.063(2) 0.071(3) 0.057(2) 0.009(2) 0.012(2) -0.010(2) 
N2 0.058(2) 0.046(2) 0.062(2) 0.004(2) 0.007(2) 0.000(2) 
N3 0.052(2) 0.071(3) 0.088(3) 0.011(2) 0.006(2) -0.003(2) 
C1 0.138(6) 0.087(4) 0.086(4) 0.014(3) -0.022(4) 0.020(4) 
C2 0.088(5) 0.155(7) 0.115(5) 0.010(5) -0.021(4) -0.015(5) 
C3 0.147(7) 0.102(5) 0.092(4) -0.027(4) -0.014(4) -0.006(5) 
C4 0.083(3) 0.083(4) 0.067(3) 0.004(3) -0.007(3) 0.005(3) 
C5 0.075(3) 0.058(3) 0.057(3) 0.006(2) 0.003(2) 0.002(3) 
C6 0.073(3) 0.107(4) 0.082(3) 0.008(3) 0.025(3) -0.002(3) 
C7 0.084(4) 0.146(7) 0.103(4) 0.011(5) 0.027(4) -0.026(5) 
C8 0.068(3) 0.094(4) 0.116(4) 0.019(4) 0.000(3) -0.026(3) 
C9 0.054(2) 0.064(3) 0.074(3) 0.000(3) 0.008(2) -0.010(2) 
C10 0.051(2) 0.057(3) 0.068(3) -0.002(2) 0.002(2) 0.000(2) 
C11 0.060(3) 0.124(5) 0.133(5) 0.018(5) 0.004(4) -0.014(4) 
C12 0.068(3) 0.055(3) 0.067(3) 0.001(2) 0.007(3) -0.009(3) 
C13 0.058(2) 0.053(3) 0.057(2) 0.000(2) 0.006(2) -0.004(2) 
C14 0.085(3) 0.057(3) 0.082(3) 0.001(3) 0.008(3) 0.009(3) 
C15 0.067(3) 0.061(3) 0.080(3) 0.007(2) 0.003(3) -0.002(3) 
C16 0.058(3) 0.068(3) 0.072(3) 0.012(2) -0.009(2) 0.004(2) 
C17 0.076(4) 0.108(5) 0.109(4) -0.003(4) 0.008(4) -0.020(4) 
C18 0.088(5) 0.123(6) 0.139(6) 0.005(5) -0.008(4) -0.037(5) 
C19 0.090(5) 0.116(6) 0.142(7) -0.015(5) -0.045(5) 0.002(4) 
C20 0.090(5) 0.194(9) 0.113(5) -0.045(6) -0.031(5) 0.024(6) 
C21 0.066(3) 0.139(6) 0.083(4) -0.003(4) -0.009(3) 0.005(4) 
C22 0.111(5) 0.077(4) 0.114(4) -0.004(4) -0.009(4) -0.003(4) 
 
_geom_special_details 
; 
 All esds (except the esd in the dihedral angle between two l.s. planes) 
 are estimated using the full covariance matrix.  The cell esds are taken 
 into account individually in the estimation of esds in distances, angles 
 and torsion angles; correlations between esds in cell parameters are only 
 used when they are defined by crystal symmetry.  An approximate (isotropic) 
 treatment of cell esds is used for estimating esds involving l.s. planes. 
; 
 
loop_ 
 _geom_bond_atom_site_label_1 
 _geom_bond_atom_site_label_2 
 _geom_bond_distance 
 _geom_bond_site_symmetry_2 
 _geom_bond_publ_flag 
Cl1 C22 1.741(7) . ? 
Cl2 C22 1.695(7) . ? 
O1 C5 1.243(6) . ? 
O2 C10 1.230(5) . ? 
O3 C12 1.233(6) . ? 
N1 C5 1.328(7) . ? 
N1 C9 1.471(6) . ? 
N1 C6 1.470(6) . ? 
N2 C10 1.336(6) . ? 
N2 C13 1.437(6) . ? 
N2 H2 1.025(11) . ? 
N3 C12 1.320(6) . ? 
N3 C11 1.445(8) . ? 
N3 H3 1.033(11) . ? 
C1 C4 1.522(8) . ? 
C1 H11 0.96 . ? 
C1 H12 0.96 . ? 
C1 H13 0.96 . ? 
C2 C4 1.540(9) . ? 
C2 H21 0.96 . ? 
C2 H22 0.96 . ? 
C2 H23 0.96 . ? 
C3 C4 1.552(9) . ? 
C3 H31 0.96 . ? 
C3 H32 0.96 . ? 
C3 H33 0.96 . ? 
C4 C5 1.552(7) . ? 
C6 C7 1.483(9) . ? 
C6 H61 0.97 . ? 
C6 H62 0.97 . ? 
C7 C8 1.497(9) . ? 
C7 H71 0.97 . ? 
C7 H72 0.97 . ? 
C8 C9 1.541(7) . ? 
C8 H81 0.97 . ? 
C8 H82 0.97 . ? 
C9 C10 1.532(7) . ? 
C9 H9 0.98 . ? 
C11 H111 0.96 . ? 
C11 H112 0.96 . ? 
C11 H113 0.96 . ? 
C12 C13 1.503(7) . ? 
C13 C14 1.492(7) . ? 
C13 C15 1.536(7) . ? 
C14 C15 1.497(7) . ? 
C14 H141 1.09 . ? 
C14 H142 1.04 . ? 
C15 C16 1.485(7) . ? 
C15 H151 1.07 . ? 
C16 C17 1.353(8) . ? 
C16 C21 1.370(8) . ? 
C17 C18 1.363(9) . ? 
C17 H171 0.93 . ? 
C18 C19 1.339(10) . ? 
C18 H181 0.93 . ? 
C19 C20 1.357(12) . ? 
C19 H191 0.93 . ? 
C20 C21 1.378(10) . ? 
C20 H201 0.93 . ? 
C21 H211 0.93 . ? 
C22 H221 0.97 . ? 
C22 H222 0.97 . ? 
 
loop_ 
 _geom_angle_atom_site_label_1 
 _geom_angle_atom_site_label_2 
 _geom_angle_atom_site_label_3 
 _geom_angle 
 _geom_angle_site_symmetry_1 
 _geom_angle_site_symmetry_3 
 _geom_angle_publ_flag 
C5 N1 C9 118.5(4) . . ? 
C5 N1 C6 130.0(4) . . ? 
C9 N1 C6 111.6(4) . . ? 
C10 N2 C13 123.0(4) . . ? 
C10 N2 H2 114.3(41) . . ? 
C13 N2 H2 121.4(42) . . ? 
C12 N3 C11 123.1(5) . . ? 
C12 N3 H3 113.8(45) . . ? 
C11 N3 H3 123.1(45) . . ? 
C4 C1 H11 109.5(4) . . ? 
C4 C1 H12 109.4(3) . . ? 
H11 C1 H12 109.5 . . ? 
C4 C1 H13 109.5(3) . . ? 
H11 C1 H13 109.5 . . ? 
H12 C1 H13 109.5 . . ? 
C4 C2 H21 109.4(4) . . ? 
C4 C2 H22 109.5(4) . . ? 
H21 C2 H22 109.5 . . ? 
C4 C2 H23 109.5(3) . . ? 
H21 C2 H23 109.5 . . ? 
H22 C2 H23 109.5 . . ? 
C4 C3 H31 109.5(3) . . ? 
C4 C3 H32 109.5(4) . . ? 
H31 C3 H32 109.5 . . ? 
C4 C3 H33 109.5(4) . . ? 
H31 C3 H33 109.5 . . ? 
H32 C3 H33 109.5 . . ? 
C1 C4 C2 110.2(6) . . ? 
C1 C4 C5 109.7(5) . . ? 
C2 C4 C5 107.4(5) . . ? 
C1 C4 C3 111.2(5) . . ? 
C2 C4 C3 107.6(6) . . ? 
C5 C4 C3 110.6(5) . . ? 
O1 C5 N1 118.6(4) . . ? 
O1 C5 C4 118.0(5) . . ? 
N1 C5 C4 123.4(4) . . ? 
N1 C6 C7 103.3(4) . . ? 
N1 C6 H61 111.1(3) . . ? 
C7 C6 H61 111.1(4) . . ? 
N1 C6 H62 111.1(3) . . ? 
C7 C6 H62 111.1(4) . . ? 
H61 C6 H62 109.1 . . ? 
C6 C7 C8 105.3(5) . . ? 
C6 C7 H71 110.7(3) . . ? 
C8 C7 H71 110.7(4) . . ? 
C6 C7 H72 110.7(5) . . ? 
C8 C7 H72 110.7(4) . . ? 
H71 C7 H72 108.8 . . ? 
C7 C8 C9 104.6(5) . . ? 
C7 C8 H81 110.8(4) . . ? 
C9 C8 H81 110.9(3) . . ? 
C7 C8 H82 110.8(4) . . ? 
C9 C8 H82 110.8(3) . . ? 
H81 C8 H82 108.9 . . ? 
N1 C9 C10 109.5(4) . . ? 
N1 C9 C8 103.3(4) . . ? 
C10 C9 C8 111.4(5) . . ? 
N1 C9 H9 110.8(3) . . ? 
C10 C9 H9 110.8(3) . . ? 
C8 C9 H9 110.8(3) . . ? 
O2 C10 N2 124.8(4) . . ? 
O2 C10 C9 119.8(4) . . ? 
N2 C10 C9 115.4(4) . . ? 
N3 C11 H111 109.5(4) . . ? 
N3 C11 H112 109.5(4) . . ? 
H111 C11 H112 109.5 . . ? 
N3 C11 H113 109.5(4) . . ? 
H111 C11 H113 109.5 . . ? 
H112 C11 H113 109.5 . . ? 
O3 C12 N3 122.7(5) . . ? 
O3 C12 C13 120.2(5) . . ? 
N3 C12 C13 117.1(4) . . ? 
N2 C13 C12 116.5(4) . . ? 
N2 C13 C14 118.8(4) . . ? 
C12 C13 C14 115.9(4) . . ? 
N2 C13 C15 117.7(4) . . ? 
C12 C13 C15 116.4(4) . . ? 
C14 C13 C15 59.2(3) . . ? 
C15 C14 C13 61.9(3) . . ? 
C15 C14 H141 118.8(3) . . ? 
C13 C14 H141 121.0(3) . . ? 
C15 C14 H142 117.7(3) . . ? 
C13 C14 H142 111.8(3) . . ? 
H141 C14 H142 115.2 . . ? 
C16 C15 C14 123.2(5) . . ? 
C16 C15 C13 121.6(4) . . ? 
C14 C15 C13 58.9(3) . . ? 
C16 C15 H151 120.5(3) . . ? 
C14 C15 H151 107.9(3) . . ? 
C13 C15 H151 109.3(3) . . ? 
C17 C16 C21 117.2(6) . . ? 
C17 C16 C15 124.4(5) . . ? 
C21 C16 C15 118.3(5) . . ? 
C16 C17 C18 122.0(7) . . ? 
C16 C17 H171 119.0(4) . . ? 
C18 C17 H171 119.0(5) . . ? 
C19 C18 C17 121.7(7) . . ? 
C19 C18 H181 119.2(5) . . ? 
C17 C18 H181 119.2(5) . . ? 
C18 C19 C20 117.1(7) . . ? 
C18 C19 H191 121.5(5) . . ? 
C20 C19 H191 121.4(5) . . ? 
C19 C20 C21 122.2(7) . . ? 
C19 C20 H201 118.9(5) . . ? 
C21 C20 H201 118.9(5) . . ? 
C16 C21 C20 119.8(7) . . ? 
C16 C21 H211 120.1(4) . . ? 
C20 C21 H211 120.1(5) . . ? 
Cl2 C22 Cl1 113.7(4) . . ? 
Cl2 C22 H221 108.8(3) . . ? 
Cl1 C22 H221 108.8(3) . . ? 
Cl2 C22 H222 108.8(3) . . ? 
Cl1 C22 H222 108.8(3) . . ? 
H221 C22 H222 107.7 . . ? 
 
loop_ 
 _geom_torsion_atom_site_label_1 
 _geom_torsion_atom_site_label_2 
 _geom_torsion_atom_site_label_3 
 _geom_torsion_atom_site_label_4 
 _geom_torsion 
 _geom_torsion_site_symmetry_1 
 _geom_torsion_site_symmetry_2 
 _geom_torsion_site_symmetry_3 
 _geom_torsion_site_symmetry_4 
 _geom_torsion_publ_flag 
 C9 N1 C5 O1 -3.6(8) . . . . ? 
 C6 N1 C5 O1 177.0(5) . . . . ? 
 C9 N1 C5 C4 176.7(4) . . . . ? 
 C6 N1 C5 C4 -2.6(9) . . . . ? 
 C1 C4 C5 O1 -107.3(6) . . . . ? 
 C2 C4 C5 O1 12.4(7) . . . . ? 
 C3 C4 C5 O1 129.7(6) . . . . ? 
 C1 C4 C5 N1 72.3(7) . . . . ? 
 C2 C4 C5 N1 -167.9(6) . . . . ? 
 C3 C4 C5 N1 -50.7(7) . . . . ? 
 C5 N1 C6 C7 -160.6(6) . . . . ? 
 C9 N1 C6 C7 20.0(7) . . . . ? 
 N1 C6 C7 C8 -32.9(7) . . . . ? 
 C6 C7 C8 C9 33.8(7) . . . . ? 
 C5 N1 C9 C10 -60.1(6) . . . . ? 
 C6 N1 C9 C10 119.4(5) . . . . ? 
 C5 N1 C9 C8 -178.8(5) . . . . ? 
 C6 N1 C9 C8 0.6(6) . . . . ? 
 C7 C8 C9 N1 -20.9(6) . . . . ? 
 C7 C8 C9 C10 -138.3(5) . . . . ? 
 C13 N2 C10 O2 8.3(7) . . . . ? 
 C13 N2 C10 C9 -172.7(4) . . . . ? 
 N1 C9 C10 O2 -46.8(6) . . . . ? 
 C8 C9 C10 O2 66.8(6) . . . . ? 
 N1 C9 C10 N2 134.1(4) . . . . ? 
 C8 C9 C10 N2 -112.3(5) . . . . ? 
 C11 N3 C12 O3 3.1(8) . . . . ? 
 C11 N3 C12 C13 -175.6(5) . . . . ? 
 C10 N2 C13 C12 88.9(5) . . . . ? 
 C10 N2 C13 C14 -57.4(6) . . . . ? 
 C10 N2 C13 C15 -125.6(5) . . . . ? 
 O3 C12 C13 N2 176.7(4) . . . . ? 
 N3 C12 C13 N2 -4.5(6) . . . . ? 
 O3 C12 C13 C14 -36.0(7) . . . . ? 
 N3 C12 C13 C14 142.7(4) . . . . ? 
 O3 C12 C13 C15 30.8(6) . . . . ? 
 N3 C12 C13 C15 -150.4(4) . . . . ? 
 N2 C13 C14 C15 -106.9(5) . . . . ? 
 C12 C13 C14 C15 106.7(5) . . . . ? 
 C15 C13 C14 C15 0.000(1) . . . . ? 
 C13 C14 C15 C16 109.7(5) . . . . ? 
 C13 C14 C15 C13 0.000(1) . . . . ? 
 N2 C13 C15 C16 -3.6(6) . . . . ? 
 C12 C13 C15 C16 141.9(5) . . . . ? 
 C14 C13 C15 C16 -112.3(5) . . . . ? 
 N2 C13 C15 C14 108.7(5) . . . . ? 
 C12 C13 C15 C14 -105.8(5) . . . . ? 
 C14 C13 C15 C14 0.000(1) . . . . ? 
 C14 C15 C16 C17 -15.6(8) . . . . ? 
 C13 C15 C16 C17 55.6(7) . . . . ? 
 C14 C15 C16 C21 161.7(5) . . . . ? 
 C13 C15 C16 C21 -127.0(6) . . . . ? 
 C21 C16 C17 C18 3.0(10) . . . . ? 
 C15 C16 C17 C18 -179.6(6) . . . . ? 
 C16 C17 C18 C19 0.2(12) . . . . ? 
 C17 C18 C19 C20 -1.8(13) . . . . ? 
 C18 C19 C20 C21 0.3(14) . . . . ? 
 C17 C16 C21 C20 -4.4(10) . . . . ? 
 C15 C16 C21 C20 178.0(6) . . . . ? 
 C19 C20 C21 C16 3.0(13) . . . . ? 
 
_refine_diff_density_max     .204 
_refine_diff_density_min    -.171 
_refine_diff_density_rms     .043 


 
data_peptide2c 
 
_audit_creation_method            SHELXL 
_chemical_name_systematic 
; 
 Z-S-Pro-(2S,3S)-2,3-methanophenylalanine-NHMe 
; 
_chemical_name_common             ? 
_chemical_formula_moiety          ? 
_chemical_formula_structural      ? 
_chemical_formula_analytical      ? 
_chemical_formula_sum             'C24 H27 N3 O4' 
_chemical_formula_weight          421.49 
_chemical_melting_point           ? 
_chemical_compound_source         ? 
 
loop_ 
 _atom_type_symbol 
 _atom_type_description 
 _atom_type_scat_dispersion_real 
 _atom_type_scat_dispersion_imag 
 _atom_type_scat_source 
 'C'  'C'    .0181    .0091 
 'International Tables Vol C Tables 4.2.6.8 and 6.1.1.4' 
 'H'  'H'    .0000    .0000 
 'International Tables Vol C Tables 4.2.6.8 and 6.1.1.4' 
 'O'  'O'    .0492    .0322 
 'International Tables Vol C Tables 4.2.6.8 and 6.1.1.4' 
 'N'  'N'    .0311    .0180 
 'International Tables Vol C Tables 4.2.6.8 and 6.1.1.4' 
 
_symmetry_cell_setting            Monoclinic 
_symmetry_space_group_name_H-M    P21 
 
loop_ 
 _symmetry_equiv_pos_as_xyz 
 'x, y, z' 
 '-x, y+1/2, -z' 
 
_cell_length_a                    4.947(2) 
_cell_length_b                    21.204(4) 
_cell_length_c                    10.671(2) 
_cell_angle_alpha                 90.00 
_cell_angle_beta                  99.33(3) 
_cell_angle_gamma                 90.00 
_cell_volume                      1104.5(5) 
_cell_formula_units_Z             2 
_cell_measurement_temperature     293(2) 
_cell_measurement_reflns_used     25 
_cell_measurement_theta_min       20 
_cell_measurement_theta_max       30 
 
_exptl_crystal_description        'Transparent prism' 
_exptl_crystal_colour             Colourless 
_exptl_crystal_size_max           ? 
_exptl_crystal_size_mid           ? 
_exptl_crystal_size_min           ? 
_exptl_crystal_density_meas       ? 
_exptl_crystal_density_diffrn     1.267 
_exptl_crystal_density_method     ? 
_exptl_crystal_F_000              448 
_exptl_absorpt_coefficient_mu     0.708 
_exptl_absorpt_correction_type    none 
_exptl_absorpt_correction_T_min   ? 
_exptl_absorpt_correction_T_max   ? 
 
_exptl_special_details 
; 
 ? 
; 
 
_diffrn_ambient_temperature       293(2) 
_diffrn_radiation_wavelength      1.54180 
_diffrn_radiation_type            CuK\a 
_diffrn_radiation_source          'fine-focus sealed tube' 
_diffrn_radiation_monochromator   graphite 
_diffrn_measurement_device        'Nonius CAD-4 four circle diffractometer'
_diffrn_measurement_method        \w/2\q 
_diffrn_standards_number          3 
_diffrn_standards_interval_count  ? 
_diffrn_standards_interval_time   90 
_diffrn_standards_decay_%         0 
_diffrn_reflns_number             2070 
_diffrn_reflns_av_R_equivalents   0.0000 
_diffrn_reflns_av_sigmaI/netI     0.0210 
_diffrn_reflns_limit_h_min        0 
_diffrn_reflns_limit_h_max        5 
_diffrn_reflns_limit_k_min        0 
_diffrn_reflns_limit_k_max        25 
_diffrn_reflns_limit_l_min        -12 
_diffrn_reflns_limit_l_max        12 
_diffrn_reflns_theta_min          4.17 
_diffrn_reflns_theta_max          69.86 
_reflns_number_total              2070 
_reflns_number_observed           1734 
_reflns_observed_criterion        >2sigma(I) 
 
_computing_data_collection        ? 
_computing_cell_refinement        ? 
_computing_data_reduction         ? 
_computing_structure_solution     'SIR92' 
_computing_structure_refinement   'SHELXL-93 (Sheldrick, 1993)' 
_computing_molecular_graphics     ? 
_computing_publication_material   SHELXL-93 
 
_refine_special_details 
; 
 Refinement on F^2^ for ALL reflections except for 0 with very negative F^2^ 
 or flagged by the user for potential systematic errors.  Weighted R-factors 
 wR and all goodnesses of fit S are based on F^2^, conventional R-factors R 
 are based on F, with F set to zero for negative F^2^. The observed criterion 
 of F^2^ > 2sigma(F^2^) is used only for calculating _R_factor_obs etc. and is 
 not relevant to the choice of reflections for refinement.  R-factors based 
 on F^2^ are statistically about twice as large as those based on F, and R- 
 factors based on ALL data will be even larger. 
; 
 
_refine_ls_structure_factor_coef  Fsqd  
_refine_ls_matrix_type            full 
_refine_ls_weighting_scheme 
 'calc w=1/[s^2^(Fo^2^)+( 0.0797P)^2^+0.2016P] where P=(Fo^2^+2Fc^2^)/3' 
_atom_sites_solution_primary      direct 
_atom_sites_solution_secondary    difmap 
_atom_sites_solution_hydrogens    geom 
_refine_ls_hydrogen_treatment     ? 
_refine_ls_extinction_method      SHELXL 
_refine_ls_extinction_coef        0.0077(14) 
_refine_ls_extinction_expression 
 'Fc^*^=kFc[1+0.001xFc^2^l^3^/sin(2q)]^-1/4^' 
_refine_ls_abs_structure_details 
 'Flack H D (1983), Acta Cryst. A39, 876-881' 
_refine_ls_abs_structure_Flack    -0.46(41) 
_refine_ls_number_reflns          2070 
_refine_ls_number_parameters      287 
_refine_ls_number_restraints      2 
_refine_ls_R_factor_all           0.0599 
_refine_ls_R_factor_obs           0.0483 
_refine_ls_wR_factor_all          0.1384 
_refine_ls_wR_factor_obs          0.1202 
_refine_ls_goodness_of_fit_all    1.082 
_refine_ls_goodness_of_fit_obs    1.042 
_refine_ls_restrained_S_all       1.081 
_refine_ls_restrained_S_obs       1.041 
_refine_ls_shift/esd_max          -0.045 
_refine_ls_shift/esd_mean         0.011 
 
loop_ 
 _atom_site_label 
 _atom_site_type_symbol 
 _atom_site_fract_x 
 _atom_site_fract_y 
 _atom_site_fract_z 
 _atom_site_U_iso_or_equiv 
 _atom_site_thermal_displace_type 
 _atom_site_occupancy 
 _atom_site_calc_flag 
 _atom_site_refinement_flags 
 _atom_site_disorder_group 
O0 O 1.2425(7) 0.4133(2) 0.1820(3) 0.0655(8) Uani 1 d . . 
O1 O 1.0524(8) 0.3926(2) 0.3584(3) 0.0705(9) Uani 1 d . . 
O2 O 1.2213(5) 0.2490 0.3976(2) 0.0500(7) Uani 1 d . . 
O3 O 1.1963(6) 0.2641(2) 0.7913(2) 0.0623(8) Uani 1 d . . 
N1 N 0.9939(7) 0.3268(2) 0.1883(3) 0.0503(8) Uani 1 d . . 
N2 N 0.8190(6) 0.2624(2) 0.4691(3) 0.0417(7) Uani 1 d D . 
N3 N 1.1914(8) 0.3350(2) 0.6334(3) 0.0607(9) Uani 1 d D . 
H2 H 0.6101(26) 0.2651(34) 0.4444(56) 0.102(4) Uiso 1 d D . 
H3 H 1.1160(115) 0.3442(32) 0.5399(20) 0.102(4) Uiso 1 d D . 
C1 C 1.4864(10) 0.5064(3) 0.1461(5) 0.0640(12) Uani 1 d . . 
C2 C 1.4949(12) 0.5719(3) 0.1473(5) 0.0768(14) Uani 1 d . . 
H2A H 1.3987(12) 0.5940(3) 0.2011(5) 0.102(4) Uiso 1 calc R . 
C3 C 1.6427(15) 0.6044(3) 0.0706(6) 0.094(2) Uani 1 d . . 
H3A H 1.6487(15) 0.6482(3) 0.0734(6) 0.102(4) Uiso 1 calc R . 
C4 C 1.7826(15) 0.5720(4) -0.0110(6) 0.094(2) Uani 1 d . . 
H4A H 1.8842(15) 0.5939(4) -0.0629(6) 0.102(4) Uiso 1 calc R . 
C5 C 1.7714(14) 0.5072(4) -0.0153(7) 0.097(2) Uani 1 d . . 
H5A H 1.8639(14) 0.4852(4) -0.0708(7) 0.102(4) Uiso 1 calc R . 
C6 C 1.6225(12) 0.4748(3) 0.0629(6) 0.0774(14) Uani 1 d . . 
H6A H 1.6143(12) 0.4311(3) 0.0591(6) 0.102(4) Uiso 1 calc R . 
C7 C 1.3409(13) 0.4722(3) 0.2386(5) 0.082(2) Uani 1 d . . 
H7A H 1.4654(13) 0.4646(3) 0.3172(5) 0.102(4) Uiso 1 calc R . 
H7B H 1.1887(13) 0.4973(3) 0.2576(5) 0.102(4) Uiso 1 calc R . 
C8 C 1.0928(9) 0.3789(3) 0.2523(4) 0.0557(10) Uani 1 d . . 
C9 C 1.0370(10) 0.3088(3) 0.0612(4) 0.0608(11) Uani 1 d . . 
H9A H 1.2240(10) 0.2950(3) 0.0615(4) 0.102(4) Uiso 1 calc R . 
H9B H 0.9970(10) 0.3437(3) 0.0022(4) 0.102(4) Uiso 1 calc R . 
C10 C 0.8362(10) 0.2549(3) 0.0267(4) 0.0675(12) Uani 1 d . . 
H10A H 0.6607(10) 0.2704(3) -0.0159(4) 0.102(4) Uiso 1 calc R . 
H10B H 0.9069(10) 0.2246(3) -0.0277(4) 0.102(4) Uiso 1 calc R . 
C11 C 0.8106(11) 0.2260(3) 0.1544(4) 0.0642(12) Uani 1 d . . 
H11A H 0.9564(11) 0.1958(3) 0.1801(4) 0.102(4) Uiso 1 calc R . 
H11B H 0.6358(11) 0.2048(3) 0.1506(4) 0.102(4) Uiso 1 calc R . 
C12 C 0.8326(8) 0.2816(2) 0.2469(3) 0.0473(9) Uani 1 d . . 
H12 H 0.6508(8) 0.2987(2) 0.2521(3) 0.102(4) Uiso 1 calc R . 
C13 C 0.9806(7) 0.2626(2) 0.3783(3) 0.0405(7) Uani 1 d . . 
C14 C 1.4033(13) 0.3731(3) 0.7054(6) 0.085(2) Uani 1 d . . 
H14A H 1.4346(13) 0.4097(3) 0.6568(6) 0.102(4) Uiso 1 calc R . 
H14B H 1.5692(13) 0.3490(3) 0.7238(6) 0.102(4) Uiso 1 calc R . 
H14C H 1.3468(13) 0.3860(3) 0.7835(6) 0.102(4) Uiso 1 calc R . 
C15 C 1.1104(8) 0.2809(2) 0.6814(3) 0.0477(9) Uani 1 d . . 
C16 C 0.9102(7) 0.2403(2) 0.5960(3) 0.0443(8) Uani 1 d . . 
C17 C 0.6991(8) 0.2058(3) 0.6555(4) 0.0530(10) Uani 1 d . . 
H17A H 0.5034(8) 0.1997(3) 0.5998(4) 0.102(4) Uiso 1 d R . 
H17B H 0.6927(8) 0.2161(3) 0.7598(4) 0.102(4) Uiso 1 d R . 
C18 C 0.9383(8) 0.1687(2) 0.6204(4) 0.0481(9) Uani 1 d . . 
H18 H 1.0856(8) 0.1612(2) 0.6995(4) 0.102(4) Uiso 1 d R . 
C19 C 0.9078(9) 0.1224(2) 0.5177(4) 0.0558(10) Uani 1 d . . 
C20 C 0.6923(12) 0.1230(3) 0.4149(5) 0.0771(14) Uani 1 d . . 
H20 H 0.5553(12) 0.1534(3) 0.4104(5) 0.102(4) Uiso 1 calc R . 
C21 C 0.6845(21) 0.0780(5) 0.3197(7) 0.114(3) Uani 1 d . . 
H21 H 0.5433(21) 0.0793(5) 0.2506(7) 0.102(4) Uiso 1 calc R . 
C22 C 0.8808(24) 0.0317(5) 0.3252(9) 0.127(3) Uani 1 d . . 
H22 H 0.8740(24) 0.0019(5) 0.2606(9) 0.102(4) Uiso 1 calc R . 
C23 C 1.0854(18) 0.0304(4) 0.4274(9) 0.122(3) Uani 1 d . . 
H23 H 1.2158(18) -0.0015(4) 0.4334(9) 0.102(4) Uiso 1 calc R . 
C24 C 1.1043(14) 0.0749(3) 0.5218(7) 0.089(2) Uani 1 d . . 
H24 H 1.2495(14) 0.0735(3) 0.5890(7) 0.102(4) Uiso 1 calc R . 
 
loop_ 
 _atom_site_aniso_label 
 _atom_site_aniso_U_11 
 _atom_site_aniso_U_22 
 _atom_site_aniso_U_33 
 _atom_site_aniso_U_23 
 _atom_site_aniso_U_13 
 _atom_site_aniso_U_12 
O0 0.083(2) 0.058(2) 0.060(2) -0.0033(14) 0.024(2) -0.021(2) 
O1 0.105(3) 0.063(2) 0.049(2) -0.0078(15) 0.026(2) -0.008(2) 
O2 0.0339(13) 0.068(2) 0.0492(14) 0.0044(12) 0.0101(10) 0.0009(12) 
O3 0.063(2) 0.084(2) 0.0383(13) -0.0031(15) 0.0040(12) 0.003(2) 
N1 0.062(2) 0.055(2) 0.037(2) 0.0024(14) 0.0168(13) -0.0041(15) 
N2 0.0362(14) 0.055(2) 0.0348(13) 0.0040(13) 0.0079(11) 0.0007(13) 
N3 0.072(2) 0.057(2) 0.051(2) -0.007(2) 0.003(2) -0.004(2) 
C1 0.068(3) 0.059(3) 0.063(3) 0.002(2) 0.004(2) -0.012(2) 
C2 0.094(4) 0.060(3) 0.074(3) -0.006(3) 0.007(3) -0.019(3) 
C3 0.114(5) 0.073(4) 0.083(4) 0.017(3) -0.015(4) -0.028(3) 
C4 0.102(4) 0.099(5) 0.076(4) 0.029(3) 0.003(3) -0.035(4) 
C5 0.103(5) 0.100(5) 0.096(4) 0.022(4) 0.040(4) 0.001(4) 
C6 0.089(4) 0.061(3) 0.089(4) 0.015(3) 0.032(3) 0.000(3) 
C7 0.113(4) 0.065(3) 0.073(3) -0.015(2) 0.030(3) -0.034(3) 
C8 0.062(2) 0.057(2) 0.050(2) 0.002(2) 0.014(2) -0.003(2) 
C9 0.067(3) 0.077(3) 0.041(2) -0.005(2) 0.017(2) -0.005(2) 
C10 0.074(3) 0.085(3) 0.045(2) -0.014(2) 0.011(2) -0.009(3) 
C11 0.078(3) 0.070(3) 0.043(2) -0.008(2) 0.004(2) -0.018(2) 
C12 0.044(2) 0.060(2) 0.040(2) 0.004(2) 0.011(2) -0.005(2) 
C13 0.038(2) 0.044(2) 0.041(2) -0.0039(15) 0.0086(13) -0.0055(15) 
C14 0.095(4) 0.070(3) 0.083(4) -0.015(3) -0.005(3) -0.011(3) 
C15 0.046(2) 0.059(2) 0.039(2) -0.001(2) 0.010(2) 0.007(2) 
C16 0.039(2) 0.060(2) 0.035(2) 0.000(2) 0.0095(13) -0.003(2) 
C17 0.047(2) 0.068(3) 0.048(2) 0.010(2) 0.019(2) 0.000(2) 
C18 0.049(2) 0.055(2) 0.042(2) 0.007(2) 0.010(2) 0.002(2) 
C19 0.054(2) 0.060(2) 0.057(2) 0.001(2) 0.018(2) -0.012(2) 
C20 0.085(3) 0.071(3) 0.072(3) -0.003(3) 0.004(3) -0.021(3) 
C21 0.153(7) 0.114(6) 0.075(4) -0.025(4) 0.016(4) -0.067(6) 
C22 0.178(9) 0.101(6) 0.120(6) -0.058(5) 0.078(6) -0.068(6) 
C23 0.130(6) 0.075(4) 0.175(9) -0.047(5) 0.066(7) -0.009(4) 
C24 0.091(4) 0.067(3) 0.113(5) -0.012(3) 0.027(3) 0.007(3) 
 
_geom_special_details 
; 
 All esds (except the esd in the dihedral angle between two l.s. planes) 
 are estimated using the full covariance matrix.  The cell esds are taken 
 into account individually in the estimation of esds in distances, angles 
 and torsion angles; correlations between esds in cell parameters are only 
 used when they are defined by crystal symmetry.  An approximate (isotropic) 
 treatment of cell esds is used for estimating esds involving l.s. planes. 
; 
 
loop_ 
 _geom_bond_atom_site_label_1 
 _geom_bond_atom_site_label_2 
 _geom_bond_distance 
 _geom_bond_site_symmetry_2 
 _geom_bond_publ_flag 
O0 C8 1.350(5) . ? 
O0 C7 1.438(6) . ? 
O1 C8 1.216(5) . ? 
O2 C13 1.210(4) . ? 
O3 C15 1.233(5) . ? 
N1 C8 1.349(5) . ? 
N1 C12 1.453(5) . ? 
N1 C9 1.457(5) . ? 
N2 C13 1.352(4) . ? 
N2 C16 1.436(4) . ? 
N2 H2 1.026(11) . ? 
N3 C15 1.343(6) . ? 
N3 C14 1.443(7) . ? 
N3 H3 1.025(11) . ? 
C1 C6 1.373(7) . ? 
C1 C2 1.388(7) . ? 
C1 C7 1.500(7) . ? 
C2 C3 1.369(9) . ? 
C2 H2A 0.93 . ? 
C3 C4 1.379(10) . ? 
C3 H3A 0.93 . ? 
C4 C5 1.377(10) . ? 
C4 H4A 0.93 . ? 
C5 C6 1.381(8) . ? 
C5 H5A 0.93 . ? 
C6 H6A 0.93 . ? 
C7 H7A 0.97 . ? 
C7 H7B 0.97 . ? 
C9 C10 1.519(7) . ? 
C9 H9A 0.97 . ? 
C9 H9B 0.97 . ? 
C10 C11 1.518(6) . ? 
C10 H10A 0.97 . ? 
C10 H10B 0.97 . ? 
C11 C12 1.529(6) . ? 
C11 H11A 0.97 . ? 
C11 H11B 0.97 . ? 
C12 C13 1.527(5) . ? 
C12 H12 0.98 . ? 
C14 H14A 0.96 . ? 
C14 H14B 0.96 . ? 
C14 H14C 0.96 . ? 
C15 C16 1.503(5) . ? 
C16 C17 1.498(5) . ? 
C16 C18 1.543(6) . ? 
C17 C18 1.518(5) . ? 
C17 H17A 1.06 . ? 
C17 H17B 1.14 . ? 
C18 C19 1.462(6) . ? 
C18 H18 1.03 . ? 
C19 C24 1.395(7) . ? 
C19 C20 1.400(7) . ? 
C20 C21 1.390(10) . ? 
C20 H20 0.93 . ? 
C21 C22 1.376(13) . ? 
C21 H21 0.93 . ? 
C22 C23 1.363(13) . ? 
C22 H22 0.93 . ? 
C23 C24 1.373(10) . ? 
C23 H23 0.93 . ? 
C24 H24 0.93 . ? 
 
loop_ 
 _geom_angle_atom_site_label_1 
 _geom_angle_atom_site_label_2 
 _geom_angle_atom_site_label_3 
 _geom_angle 
 _geom_angle_site_symmetry_1 
 _geom_angle_site_symmetry_3 
 _geom_angle_publ_flag 
C8 O0 C7 114.5(3) . . ? 
C8 N1 C12 120.2(3) . . ? 
C8 N1 C9 126.2(3) . . ? 
C12 N1 C9 113.7(3) . . ? 
C13 N2 C16 123.0(3) . . ? 
C13 N2 H2 120.3(35) . . ? 
C16 N2 H2 114.2(35) . . ? 
C15 N3 C14 120.8(4) . . ? 
C15 N3 H3 116.7(39) . . ? 
C14 N3 H3 121.9(39) . . ? 
C6 C1 C2 118.4(5) . . ? 
C6 C1 C7 121.8(5) . . ? 
C2 C1 C7 119.7(5) . . ? 
C3 C2 C1 121.1(6) . . ? 
C3 C2 H2A 119.5(4) . . ? 
C1 C2 H2A 119.5(3) . . ? 
C2 C3 C4 119.9(6) . . ? 
C2 C3 H3A 120.0(4) . . ? 
C4 C3 H3A 120.1(4) . . ? 
C5 C4 C3 119.8(6) . . ? 
C5 C4 H4A 120.1(4) . . ? 
C3 C4 H4A 120.1(4) . . ? 
C4 C5 C6 119.8(7) . . ? 
C4 C5 H5A 120.1(4) . . ? 
C6 C5 H5A 120.1(4) . . ? 
C1 C6 C5 121.0(6) . . ? 
C1 C6 H6A 119.5(3) . . ? 
C5 C6 H6A 119.5(4) . . ? 
O0 C7 C1 108.1(4) . . ? 
O0 C7 H7A 110.1(3) . . ? 
C1 C7 H7A 110.1(3) . . ? 
O0 C7 H7B 110.1(3) . . ? 
C1 C7 H7B 110.1(3) . . ? 
H7A C7 H7B 108.4 . . ? 
O1 C8 N1 124.5(4) . . ? 
O1 C8 O0 125.2(4) . . ? 
N1 C8 O0 110.3(3) . . ? 
N1 C9 C10 103.5(3) . . ? 
N1 C9 H9A 111.1(2) . . ? 
C10 C9 H9A 111.1(3) . . ? 
N1 C9 H9B 111.1(3) . . ? 
C10 C9 H9B 111.1(3) . . ? 
H9A C9 H9B 109.0 . . ? 
C11 C10 C9 103.5(3) . . ? 
C11 C10 H10A 111.1(3) . . ? 
C9 C10 H10A 111.1(3) . . ? 
C11 C10 H10B 111.1(3) . . ? 
C9 C10 H10B 111.1(2) . . ? 
H10A C10 H10B 109.0 . . ? 
C10 C11 C12 105.1(4) . . ? 
C10 C11 H11A 110.7(3) . . ? 
C12 C11 H11A 110.7(2) . . ? 
C10 C11 H11B 110.7(3) . . ? 
C12 C11 H11B 110.7(2) . . ? 
H11A C11 H11B 108.8 . . ? 
N1 C12 C13 110.8(3) . . ? 
N1 C12 C11 102.6(3) . . ? 
C13 C12 C11 111.3(3) . . ? 
N1 C12 H12 110.7(2) . . ? 
C13 C12 H12 110.7(2) . . ? 
C11 C12 H12 110.7(2) . . ? 
O2 C13 N2 123.9(3) . . ? 
O2 C13 C12 122.1(3) . . ? 
N2 C13 C12 114.1(3) . . ? 
N3 C14 H14A 109.5(3) . . ? 
N3 C14 H14B 109.5(3) . . ? 
H14A C14 H14B 109.5 . . ? 
N3 C14 H14C 109.5(3) . . ? 
H14A C14 H14C 109.5 . . ? 
H14B C14 H14C 109.5 . . ? 
O3 C15 N3 122.1(4) . . ? 
O3 C15 C16 120.2(4) . . ? 
N3 C15 C16 117.7(3) . . ? 
N2 C16 C17 115.2(3) . . ? 
N2 C16 C15 117.4(3) . . ? 
C17 C16 C15 117.3(3) . . ? 
N2 C16 C18 119.1(3) . . ? 
C17 C16 C18 59.9(3) . . ? 
C15 C16 C18 115.4(3) . . ? 
C16 C17 C18 61.5(3) . . ? 
C16 C17 H17A 117.3(2) . . ? 
C18 C17 H17A 118.5(2) . . ? 
C16 C17 H17B 116.9(2) . . ? 
C18 C17 H17B 119.1(2) . . ? 
H17A C17 H17B 113.8 . . ? 
C19 C18 C17 122.9(4) . . ? 
C19 C18 C16 122.7(3) . . ? 
C17 C18 C16 58.6(3) . . ? 
C19 C18 H18 118.8(2) . . ? 
C17 C18 H18 110.7(2) . . ? 
C16 C18 H18 108.7(2) . . ? 
C24 C19 C20 118.1(5) . . ? 
C24 C19 C18 118.3(5) . . ? 
C20 C19 C18 123.6(4) . . ? 
C21 C20 C19 119.5(7) . . ? 
C21 C20 H20 120.2(5) . . ? 
C19 C20 H20 120.2(3) . . ? 
C22 C21 C20 121.6(8) . . ? 
C22 C21 H21 119.2(5) . . ? 
C20 C21 H21 119.2(5) . . ? 
C23 C22 C21 118.4(7) . . ? 
C23 C22 H22 120.8(5) . . ? 
C21 C22 H22 120.8(5) . . ? 
C22 C23 C24 121.8(8) . . ? 
C22 C23 H23 119.1(5) . . ? 
C24 C23 H23 119.1(5) . . ? 
C23 C24 C19 120.6(7) . . ? 
C23 C24 H24 119.7(5) . . ? 
C19 C24 H24 119.7(3) . . ? 
 
loop_ 
 _geom_torsion_atom_site_label_1 
 _geom_torsion_atom_site_label_2 
 _geom_torsion_atom_site_label_3 
 _geom_torsion_atom_site_label_4 
 _geom_torsion 
 _geom_torsion_site_symmetry_1 
 _geom_torsion_site_symmetry_2 
 _geom_torsion_site_symmetry_3 
 _geom_torsion_site_symmetry_4 
 _geom_torsion_publ_flag 
 C6 C1 C2 C3 -2.2(8) . . . . ? 
 C7 C1 C2 C3 175.2(5) . . . . ? 
 C1 C2 C3 C4 1.0(9) . . . . ? 
 C2 C3 C4 C5 0.4(10) . . . . ? 
 C3 C4 C5 C6 -0.7(11) . . . . ? 
 C2 C1 C6 C5 1.9(9) . . . . ? 
 C7 C1 C6 C5 -175.4(6) . . . . ? 
 C4 C5 C6 C1 -0.5(10) . . . . ? 
 C8 O0 C7 C1 -176.4(4) . . . . ? 
 C6 C1 C7 O0 -31.1(7) . . . . ? 
 C2 C1 C7 O0 151.6(5) . . . . ? 
 C12 N1 C8 O1 -1.6(7) . . . . ? 
 C9 N1 C8 O1 179.9(5) . . . . ? 
 C12 N1 C8 O0 178.2(3) . . . . ? 
 C9 N1 C8 O0 -0.3(6) . . . . ? 
 C7 O0 C8 O1 -4.4(7) . . . . ? 
 C7 O0 C8 N1 175.8(4) . . . . ? 
 C8 N1 C9 C10 -168.8(4) . . . . ? 
 C12 N1 C9 C10 12.6(5) . . . . ? 
 N1 C9 C10 C11 -28.6(5) . . . . ? 
 C9 C10 C11 C12 34.8(5) . . . . ? 
 C8 N1 C12 C13 -51.0(5) . . . . ? 
 C9 N1 C12 C13 127.6(4) . . . . ? 
 C8 N1 C12 C11 -169.9(4) . . . . ? 
 C9 N1 C12 C11 8.8(5) . . . . ? 
 C10 C11 C12 N1 -26.7(4) . . . . ? 
 C10 C11 C12 C13 -145.2(4) . . . . ? 
 C16 N2 C13 O2 -6.0(6) . . . . ? 
 C16 N2 C13 C12 173.8(3) . . . . ? 
 N1 C12 C13 O2 -45.9(5) . . . . ? 
 C11 C12 C13 O2 67.5(5) . . . . ? 
 N1 C12 C13 N2 134.2(3) . . . . ? 
 C11 C12 C13 N2 -112.3(4) . . . . ? 
 C14 N3 C15 O3 5.8(7) . . . . ? 
 C14 N3 C15 C16 -173.8(4) . . . . ? 
 C13 N2 C16 C17 -143.1(4) . . . . ? 
 C13 N2 C16 C15 72.3(5) . . . . ? 
 C13 N2 C16 C18 -75.0(4) . . . . ? 
 O3 C15 C16 N2 -179.8(3) . . . . ? 
 N3 C15 C16 N2 -0.2(5) . . . . ? 
 O3 C15 C16 C17 36.3(5) . . . . ? 
 N3 C15 C16 C17 -144.0(4) . . . . ? 
 O3 C15 C16 C18 -31.3(5) . . . . ? 
 N3 C15 C16 C18 148.3(3) . . . . ? 
 N2 C16 C17 C18 110.4(4) . . . . ? 
 C15 C16 C17 C18 -104.9(4) . . . . ? 
 C18 C16 C17 C18 0.000(1) . . . . ? 
 C16 C17 C18 C19 -111.0(4) . . . . ? 
 C16 C17 C18 C16 0.000(2) . . . . ? 
 N2 C16 C18 C19 7.6(5) . . . . ? 
 C17 C16 C18 C19 111.4(4) . . . . ? 
 C15 C16 C18 C19 -140.4(4) . . . . ? 
 N2 C16 C18 C17 -103.9(4) . . . . ? 
 C17 C16 C18 C17 0.000(2) . . . . ? 
 C15 C16 C18 C17 108.2(3) . . . . ? 
 C17 C18 C19 C24 -156.1(5) . . . . ? 
 C16 C18 C19 C24 132.7(5) . . . . ? 
 C17 C18 C19 C20 24.1(6) . . . . ? 
 C16 C18 C19 C20 -47.1(6) . . . . ? 
 C24 C19 C20 C21 -1.6(8) . . . . ? 
 C18 C19 C20 C21 178.2(5) . . . . ? 
 C19 C20 C21 C22 1.5(10) . . . . ? 
 C20 C21 C22 C23 0.3(12) . . . . ? 
 C21 C22 C23 C24 -2.1(13) . . . . ? 
 C22 C23 C24 C19 1.9(12) . . . . ? 
 C20 C19 C24 C23 0.0(9) . . . . ? 
 C18 C19 C24 C23 -179.8(6) . . . . ? 
 
_refine_diff_density_max     .180 
_refine_diff_density_min    -.201 
_refine_diff_density_rms     .045 

 
data_peptide3a
 
_audit_creation_method            SHELXL 
_chemical_name_systematic 
; 
 [Boc-S-Pro-(2R,3S)-2,3-methanophenylalanine-NHMe] dichloromethane solvate 
; 
_chemical_name_common             ? 
_chemical_formula_moiety          ? 
_chemical_formula_structural      ? 
_chemical_formula_analytical      ? 
_chemical_formula_sum             'C21 H29 N3 O4 . C H2 Cl2' 
_chemical_formula_weight          472.40 
_chemical_melting_point           ? 
_chemical_compound_source         ? 
 
loop_ 
 _atom_type_symbol 
 _atom_type_description 
 _atom_type_scat_dispersion_real 
 _atom_type_scat_dispersion_imag 
 _atom_type_scat_source 
 'O'  'O'    .0492    .0322 
 'International Tables Vol C Tables 4.2.6.8 and 6.1.1.4' 
 'N'  'N'    .0311    .0180 
 'International Tables Vol C Tables 4.2.6.8 and 6.1.1.4' 
 'C'  'C'    .0181    .0091 
 'International Tables Vol C Tables 4.2.6.8 and 6.1.1.4' 
 'H'  'H'    .0000    .0000 
 'International Tables Vol C Tables 4.2.6.8 and 6.1.1.4' 
 'Cl'  'Cl'    .3639    .7018 
 'International Tables Vol C Tables 4.2.6.8 and 6.1.1.4' 
 
_symmetry_cell_setting            Orthorhombic 
_symmetry_space_group_name_H-M    P212121 
 
loop_ 
 _symmetry_equiv_pos_as_xyz 
 'x, y, z' 
 '-x+1/2, -y, z+1/2' 
 'x+1/2, -y+1/2, -z' 
 '-x, y+1/2, -z+1/2' 
 
_cell_length_a                    10.1270(10) 
_cell_length_b                    13.033(3) 
_cell_length_c                    19.130(3) 
_cell_angle_alpha                 90.00 
_cell_angle_beta                  90.00 
_cell_angle_gamma                 90.00 
_cell_volume                      2524.9(7) 
_cell_formula_units_Z             4 
_cell_measurement_temperature     293(2) 
_cell_measurement_reflns_used     25 
_cell_measurement_theta_min       20 
_cell_measurement_theta_max       30 
 
_exptl_crystal_description        'Transparent prism' 
_exptl_crystal_colour             Colourless 
_exptl_crystal_size_max           ? 
_exptl_crystal_size_mid           ? 
_exptl_crystal_size_min           ? 
_exptl_crystal_density_meas       ? 
_exptl_crystal_density_diffrn     1.243 
_exptl_crystal_density_method     ? 
_exptl_crystal_F_000              1000 
_exptl_absorpt_coefficient_mu     2.569 
_exptl_absorpt_correction_type    none 
_exptl_absorpt_correction_T_min   ? 
_exptl_absorpt_correction_T_max   ? 
 
_exptl_special_details 
; 
 ? 
; 
 
_diffrn_ambient_temperature       293(2) 
_diffrn_radiation_wavelength      1.54056 
_diffrn_radiation_type            CuK\a 
_diffrn_radiation_source          'fine-focus sealed tube' 
_diffrn_radiation_monochromator   graphite 
_diffrn_measurement_device        'Nonius CAD-4 four circle diffractometer' 
_diffrn_measurement_method        \w/2\q 
_diffrn_standards_number          3 
_diffrn_standards_interval_count  ? 
_diffrn_standards_interval_time   90 
_diffrn_standards_decay_%         0 
_diffrn_reflns_number             2537 
_diffrn_reflns_av_R_equivalents   0.0760 
_diffrn_reflns_av_sigmaI/netI     0.0136 
_diffrn_reflns_limit_h_min        -1 
_diffrn_reflns_limit_h_max        24 
_diffrn_reflns_limit_k_min        -2 
_diffrn_reflns_limit_k_max        51 
_diffrn_reflns_limit_l_min        0 
_diffrn_reflns_limit_l_max        23 
_diffrn_reflns_theta_min          4.10 
_diffrn_reflns_theta_max          69.82 
_reflns_number_total              2474 
_reflns_number_observed           1857 
_reflns_observed_criterion        >2sigma(I) 
 
_computing_data_collection        ? 
_computing_cell_refinement        ? 
_computing_data_reduction         ? 
_computing_structure_solution     'SIR92' 
_computing_structure_refinement   'SHELXL-93 (Sheldrick, 1993)' 
_computing_molecular_graphics     ? 
_computing_publication_material   SHELXL-93 
 
_refine_special_details 
; 
 Refinement on F^2^ for ALL reflections except for 50 with very negative F^2^ 
 or flagged by the user for potential systematic errors.  Weighted R-factors 
 wR and all goodnesses of fit S are based on F^2^, conventional R-factors R 
 are based on F, with F set to zero for negative F^2^. The observed criterion 
 of F^2^ > 2sigma(F^2^) is used only for calculating _R_factor_obs etc. and is 
 not relevant to the choice of reflections for refinement.  R-factors based 
 on F^2^ are statistically about twice as large as those based on F, and R- 
 factors based on ALL data will be even larger. 
; 
 
_refine_ls_structure_factor_coef  Fsqd  
_refine_ls_matrix_type            full 
_refine_ls_weighting_scheme 
 'calc w=1/[s^2^(Fo^2^)+( 0.1322P)^2^+0.8807P] where P=(Fo^2^+2Fc^2^)/3' 
_atom_sites_solution_primary      direct 
_atom_sites_solution_secondary    difmap 
_atom_sites_solution_hydrogens    geom 
_refine_ls_hydrogen_treatment     ? 
_refine_ls_extinction_method      SHELXL 
_refine_ls_extinction_coef        0.0009(4) 
_refine_ls_extinction_expression 
 'Fc^*^=kFc[1+0.001xFc^2^l^3^/sin(2q)]^-1/4^' 
_refine_ls_abs_structure_details 
 'Flack H D (1983), Acta Cryst. A39, 876-881' 
_refine_ls_abs_structure_Flack    0.10(7) 
_refine_ls_number_reflns          2424 
_refine_ls_number_parameters      289 
_refine_ls_number_restraints      2 
_refine_ls_R_factor_all           0.0846 
_refine_ls_R_factor_obs           0.0621 
_refine_ls_wR_factor_all          0.2255 
_refine_ls_wR_factor_obs          0.1698 
_refine_ls_goodness_of_fit_all    0.925 
_refine_ls_goodness_of_fit_obs    0.951 
_refine_ls_restrained_S_all       1.095 
_refine_ls_restrained_S_obs       0.951 
_refine_ls_shift/esd_max          0.004 
_refine_ls_shift/esd_mean         0.001 
 
loop_ 
 _atom_site_label 
 _atom_site_type_symbol 
 _atom_site_fract_x 
 _atom_site_fract_y 
 _atom_site_fract_z 
 _atom_site_U_iso_or_equiv 
 _atom_site_thermal_displace_type 
 _atom_site_occupancy 
 _atom_site_calc_flag 
 _atom_site_refinement_flags 
 _atom_site_disorder_group 
Cl1 Cl 0.1441(4) 0.0898(4) 0.4830(3) 0.237(3) Uani 0.860(8) d P . 
Cl2 Cl 0.3884(8) 0.1203(4) 0.5513(4) 0.342(6) Uani 0.860(8) d P . 
O1 O 0.2046(4) 0.5887(3) -0.2139(2) 0.0808(10) Uani 1 d . . 
O2 O 0.2302(4) 0.6811(3) -0.3139(2) 0.0780(10) Uani 1 d . . 
O3 O 0.0541(3) 0.5381(3) -0.4236(2) 0.0818(11) Uani 1 d . . 
O4 O -0.0141(4) 0.8225(4) -0.5193(2) 0.0948(13) Uani 1 d . . 
N1 N 0.2455(4) 0.5073(3) -0.3131(2) 0.0661(10) Uani 1 d . . 
N2 N 0.2204(4) 0.6193(3) -0.4802(2) 0.0633(10) Uani 1 d D . 
N3 N 0.1236(5) 0.7999(3) -0.4271(2) 0.0768(12) Uani 1 d D . 
H2 H 0.3165(25) 0.6443(52) -0.4777(39) 0.116(4) Uiso 1 d D . 
H3 H 0.1778(58) 0.7413(36) -0.4056(34) 0.116(4) Uiso 1 d D . 
C1 C 0.0667(10) 0.7371(9) -0.1887(5) 0.162(4) Uani 1 d . . 
H11 H 0.0787(10) 0.7658(9) -0.2344(5) 0.116(4) Uiso 1 calc R . 
H12 H 0.0539(10) 0.7914(9) -0.1555(5) 0.116(4) Uiso 1 calc R . 
H13 H -0.0092(10) 0.6931(9) -0.1887(5) 0.116(4) Uiso 1 calc R . 
C2 C 0.3084(9) 0.7436(6) -0.1721(4) 0.128(3) Uani 1 d . . 
H21 H 0.3844(9) 0.7037(6) -0.1593(4) 0.116(4) Uiso 1 calc R . 
H22 H 0.2989(9) 0.7999(6) -0.1401(4) 0.116(4) Uiso 1 calc R . 
H23 H 0.3195(9) 0.7695(6) -0.2187(4) 0.116(4) Uiso 1 calc R . 
C3 C 0.1714(10) 0.6300(6) -0.0972(3) 0.124(3) Uani 1 d . . 
H31 H 0.2494(10) 0.5915(6) -0.0859(3) 0.116(4) Uiso 1 calc R . 
H32 H 0.0961(10) 0.5852(6) -0.0967(3) 0.116(4) Uiso 1 calc R . 
H33 H 0.1593(10) 0.6835(6) -0.0634(3) 0.116(4) Uiso 1 calc R . 
C4 C 0.1861(7) 0.6766(5) -0.1690(3) 0.083(2) Uani 1 d . . 
C5 C 0.2261(5) 0.5985(4) -0.2837(2) 0.0624(11) Uani 1 d . . 
C6 C 0.2501(7) 0.4087(4) -0.2788(3) 0.084(2) Uani 1 d . . 
H61 H 0.1619(7) 0.3839(4) -0.2683(3) 0.116(4) Uiso 1 calc R . 
H62 H 0.3005(7) 0.4123(4) -0.2357(3) 0.116(4) Uiso 1 calc R . 
C7 C 0.3168(9) 0.3415(5) -0.3311(3) 0.104(2) Uani 1 d . . 
H71 H 0.4118(9) 0.3429(5) -0.3249(3) 0.116(4) Uiso 1 calc R . 
H72 H 0.2863(9) 0.2712(5) -0.3269(3) 0.116(4) Uiso 1 calc R . 
C8 C 0.2797(8) 0.3850(4) -0.3998(3) 0.093(2) Uani 1 d . . 
H81 H 0.1938(8) 0.3601(4) -0.4145(3) 0.116(4) Uiso 1 calc R . 
H82 H 0.3444(8) 0.3672(4) -0.4352(3) 0.116(4) Uiso 1 calc R . 
C9 C 0.2767(5) 0.5004(4) -0.3875(2) 0.0638(11) Uani 1 d . . 
H91 H 0.3637(5) 0.5304(4) -0.3968(2) 0.116(4) Uiso 1 calc R . 
C10 C 0.1705(5) 0.5538(4) -0.4322(2) 0.0626(11) Uani 1 d . . 
C11 C 0.0697(8) 0.8828(4) -0.3871(4) 0.102(2) Uani 1 d . . 
H111 H 0.1175(8) 0.8892(4) -0.3440(4) 0.116(4) Uiso 1 calc R . 
H112 H -0.0216(8) 0.8693(4) -0.3773(4) 0.116(4) Uiso 1 calc R . 
H113 H 0.0772(8) 0.9454(4) -0.4132(4) 0.116(4) Uiso 1 calc R . 
C12 C 0.0765(5) 0.7736(4) -0.4894(3) 0.0698(13) Uani 1 d . . 
C13 C 0.1348(5) 0.6820(4) -0.5232(3) 0.0661(12) Uani 1 d . . 
C14 C 0.0567(6) 0.6319(5) -0.5806(3) 0.0815(15) Uani 1 d . . 
H141 H 0.0302(6) 0.5553(5) -0.5764(3) 0.116(4) Uiso 1 d R . 
H142 H -0.0260(6) 0.6696(5) -0.5909(3) 0.116(4) Uiso 1 d R . 
C15 C 0.1777(5) 0.6900(4) -0.6003(2) 0.0710(13) Uani 1 d . . 
H151 H 0.2725(5) 0.6597(4) -0.6092(2) 0.116(4) Uiso 1 d R . 
C16 C 0.1813(5) 0.7870(4) -0.6419(2) 0.0642(12) Uani 1 d . . 
C17 C 0.2952(7) 0.8433(5) -0.6454(3) 0.091(2) Uani 1 d . . 
H171 H 0.3679(7) 0.8217(5) -0.6196(3) 0.116(4) Uiso 1 calc R . 
C18 C 0.3070(7) 0.9303(6) -0.6854(4) 0.106(2) Uani 1 d . . 
H181 H 0.3858(7) 0.9669(6) -0.6866(4) 0.116(4) Uiso 1 calc R . 
C19 C 0.1965(7) 0.9629(5) -0.7245(3) 0.092(2) Uani 1 d . . 
H191 H 0.2011(7) 1.0218(5) -0.7518(3) 0.116(4) Uiso 1 calc R . 
C20 C 0.0827(6) 0.9066(5) -0.7217(3) 0.086(2) Uani 1 d . . 
H201 H 0.0104(6) 0.9269(5) -0.7483(3) 0.116(4) Uiso 1 calc R . 
C21 C 0.0730(5) 0.8217(5) -0.6807(3) 0.082(2) Uani 1 d . . 
H211 H -0.0065(5) 0.7862(5) -0.6785(3) 0.116(4) Uiso 1 calc R . 
C22 C 0.3012(12) 0.0472(9) 0.4933(7) 0.146(4) Uani 0.860(8) d P . 
H221 H 0.3457(12) 0.0480(9) 0.4484(7) 0.116(4) Uiso 0.860(8) calc PR . 
H222 H 0.2993(12) -0.0232(9) 0.5098(7) 0.116(4) Uiso 0.860(8) calc PR . 
 
loop_ 
 _atom_site_aniso_label 
 _atom_site_aniso_U_11 
 _atom_site_aniso_U_22 
 _atom_site_aniso_U_33 
 _atom_site_aniso_U_23 
 _atom_site_aniso_U_13 
 _atom_site_aniso_U_12 
Cl1 0.149(3) 0.292(5) 0.270(5) 0.168(5) 0.082(3) 0.069(3) 
Cl2 0.463(11) 0.208(4) 0.354(8) -0.162(5) -0.233(8) 0.205(6) 
O1 0.110(3) 0.075(2) 0.057(2) -0.006(2) 0.009(2) -0.003(2) 
O2 0.093(3) 0.068(2) 0.074(2) 0.003(2) 0.002(2) 0.008(2) 
O3 0.058(2) 0.103(3) 0.084(2) 0.013(2) 0.001(2) -0.003(2) 
O4 0.078(2) 0.129(3) 0.078(2) 0.013(2) 0.002(2) 0.039(2) 
N1 0.072(2) 0.067(2) 0.059(2) 0.004(2) 0.003(2) 0.001(2) 
N2 0.059(2) 0.073(2) 0.057(2) 0.009(2) -0.002(2) 0.004(2) 
N3 0.080(3) 0.075(3) 0.076(3) 0.004(2) -0.004(2) 0.013(2) 
C1 0.146(8) 0.222(11) 0.117(6) -0.035(7) 0.018(6) 0.068(9) 
C2 0.171(8) 0.116(5) 0.096(5) -0.022(4) 0.012(5) -0.039(6) 
C3 0.188(9) 0.113(5) 0.070(3) -0.011(4) 0.034(4) -0.012(5) 
C4 0.097(4) 0.083(3) 0.071(3) -0.001(3) 0.005(3) 0.002(3) 
C5 0.058(3) 0.069(3) 0.060(2) 0.004(2) 0.001(2) -0.001(2) 
C6 0.110(5) 0.074(3) 0.069(3) 0.001(3) 0.000(3) 0.003(3) 
C7 0.152(7) 0.080(3) 0.079(3) 0.012(3) 0.008(4) 0.027(4) 
C8 0.131(5) 0.078(3) 0.070(3) -0.004(3) 0.001(3) 0.023(4) 
C9 0.068(3) 0.069(2) 0.054(2) 0.005(2) -0.001(2) 0.008(2) 
C10 0.058(3) 0.074(3) 0.055(2) 0.004(2) -0.001(2) 0.001(2) 
C11 0.125(5) 0.074(3) 0.106(4) 0.001(3) -0.004(4) 0.026(4) 
C12 0.062(3) 0.082(3) 0.065(3) 0.011(2) 0.007(2) 0.011(3) 
C13 0.055(3) 0.078(3) 0.065(2) 0.010(2) -0.009(2) 0.004(2) 
C14 0.078(3) 0.087(3) 0.080(3) 0.010(3) -0.022(3) -0.011(3) 
C15 0.070(3) 0.081(3) 0.062(3) 0.001(2) -0.005(2) 0.005(3) 
C16 0.060(3) 0.075(3) 0.057(2) -0.002(2) 0.000(2) 0.004(3) 
C17 0.085(4) 0.095(4) 0.095(4) 0.018(3) -0.023(3) -0.003(4) 
C18 0.091(4) 0.108(5) 0.118(5) 0.026(4) -0.010(4) -0.022(4) 
C19 0.107(5) 0.087(4) 0.080(3) 0.015(3) -0.002(3) 0.004(4) 
C20 0.077(4) 0.102(4) 0.080(3) 0.024(3) -0.003(3) 0.013(4) 
C21 0.060(3) 0.104(4) 0.081(3) 0.016(3) -0.001(2) 0.007(3) 
C22 0.133(7) 0.147(8) 0.158(9) -0.014(7) 0.018(7) 0.062(7) 
 
_geom_special_details 
; 
 All esds (except the esd in the dihedral angle between two l.s. planes) 
 are estimated using the full covariance matrix.  The cell esds are taken 
 into account individually in the estimation of esds in distances, angles 
 and torsion angles; correlations between esds in cell parameters are only 
 used when they are defined by crystal symmetry.  An approximate (isotropic) 
 treatment of cell esds is used for estimating esds involving l.s. planes. 
; 
 
loop_ 
 _geom_bond_atom_site_label_1 
 _geom_bond_atom_site_label_2 
 _geom_bond_distance 
 _geom_bond_site_symmetry_2 
 _geom_bond_publ_flag 
Cl1 C22 1.697(11) . ? 
Cl2 C22 1.708(14) . ? 
O1 C5 1.358(6) . ? 
O1 C4 1.443(7) . ? 
O2 C5 1.223(6) . ? 
O3 C10 1.208(6) . ? 
O4 C12 1.255(6) . ? 
N1 C5 1.330(6) . ? 
N1 C6 1.444(7) . ? 
N1 C9 1.461(6) . ? 
N2 C10 1.351(6) . ? 
N2 C13 1.447(6) . ? 
N2 H2 1.028(11) . ? 
N3 C12 1.328(7) . ? 
N3 C11 1.432(7) . ? 
N3 H3 1.028(11) . ? 
C1 C4 1.491(11) . ? 
C1 H11 0.96 . ? 
C1 H12 0.96 . ? 
C1 H13 0.96 . ? 
C2 C4 1.517(10) . ? 
C2 H21 0.96 . ? 
C2 H22 0.96 . ? 
C2 H23 0.96 . ? 
C3 C4 1.510(9) . ? 
C3 H31 0.96 . ? 
C3 H32 0.96 . ? 
C3 H33 0.96 . ? 
C6 C7 1.492(9) . ? 
C6 H61 0.97 . ? 
C6 H62 0.97 . ? 
C7 C8 1.479(8) . ? 
C7 H71 0.97 . ? 
C7 H72 0.97 . ? 
C8 C9 1.524(7) . ? 
C8 H81 0.97 . ? 
C8 H82 0.97 . ? 
C9 C10 1.540(7) . ? 
C9 H91 0.98 . ? 
C11 H111 0.96 . ? 
C11 H112 0.96 . ? 
C11 H113 0.96 . ? 
C12 C13 1.481(7) . ? 
C13 C14 1.503(7) . ? 
C13 C15 1.542(7) . ? 
C14 C15 1.489(8) . ? 
C14 H141 1.04 . ? 
C14 H142 0.99 . ? 
C15 C16 1.493(7) . ? 
C15 H151 1.05 . ? 
C16 C17 1.369(8) . ? 
C16 C21 1.399(7) . ? 
C17 C18 1.372(9) . ? 
C17 H171 0.93 . ? 
C18 C19 1.412(10) . ? 
C18 H181 0.93 . ? 
C19 C20 1.368(9) . ? 
C19 H191 0.93 . ? 
C20 C21 1.360(8) . ? 
C20 H201 0.93 . ? 
C21 H211 0.93 . ? 
C22 H221 0.97 . ? 
C22 H222 0.97 . ? 
 
loop_ 
 _geom_angle_atom_site_label_1 
 _geom_angle_atom_site_label_2 
 _geom_angle_atom_site_label_3 
 _geom_angle 
 _geom_angle_site_symmetry_1 
 _geom_angle_site_symmetry_3 
 _geom_angle_publ_flag 
C5 O1 C4 122.0(4) . . ? 
C5 N1 C6 127.5(4) . . ? 
C5 N1 C9 119.9(4) . . ? 
C6 N1 C9 112.4(4) . . ? 
C10 N2 C13 121.2(4) . . ? 
C10 N2 H2 121.5(41) . . ? 
C13 N2 H2 114.5(41) . . ? 
C12 N3 C11 122.5(5) . . ? 
C12 N3 H3 111.0(39) . . ? 
C11 N3 H3 123.4(39) . . ? 
C4 C1 H11 109.5(5) . . ? 
C4 C1 H12 109.5(5) . . ? 
H11 C1 H12 109.5 . . ? 
C4 C1 H13 109.5(5) . . ? 
H11 C1 H13 109.5 . . ? 
H12 C1 H13 109.5 . . ? 
C4 C2 H21 109.5(4) . . ? 
C4 C2 H22 109.5(4) . . ? 
H21 C2 H22 109.5 . . ? 
C4 C2 H23 109.5(4) . . ? 
H21 C2 H23 109.5 . . ? 
H22 C2 H23 109.5 . . ? 
C4 C3 H31 109.5(5) . . ? 
C4 C3 H32 109.5(4) . . ? 
H31 C3 H32 109.5 . . ? 
C4 C3 H33 109.5(4) . . ? 
H31 C3 H33 109.5 . . ? 
H32 C3 H33 109.5 . . ? 
O1 C4 C1 112.1(6) . . ? 
O1 C4 C3 103.6(5) . . ? 
C1 C4 C3 111.2(7) . . ? 
O1 C4 C2 109.1(5) . . ? 
C1 C4 C2 110.4(7) . . ? 
C3 C4 C2 110.3(6) . . ? 
O2 C5 N1 125.6(4) . . ? 
O2 C5 O1 123.6(4) . . ? 
N1 C5 O1 110.8(4) . . ? 
N1 C6 C7 103.4(4) . . ? 
N1 C6 H61 111.1(3) . . ? 
C7 C6 H61 111.1(4) . . ? 
N1 C6 H62 111.1(3) . . ? 
C7 C6 H62 111.1(4) . . ? 
H61 C6 H62 109.0 . . ? 
C8 C7 C6 104.9(5) . . ? 
C8 C7 H71 110.8(5) . . ? 
C6 C7 H71 110.8(4) . . ? 
C8 C7 H72 110.8(4) . . ? 
C6 C7 H72 110.8(4) . . ? 
H71 C7 H72 108.8 . . ? 
C7 C8 C9 104.3(5) . . ? 
C7 C8 H81 110.9(5) . . ? 
C9 C8 H81 110.9(4) . . ? 
C7 C8 H82 110.9(4) . . ? 
C9 C8 H82 110.9(3) . . ? 
H81 C8 H82 108.9 . . ? 
N1 C9 C8 102.4(4) . . ? 
N1 C9 C10 111.3(4) . . ? 
C8 C9 C10 112.0(4) . . ? 
N1 C9 H91 110.3(3) . . ? 
C8 C9 H91 110.3(4) . . ? 
C10 C9 H91 110.3(3) . . ? 
O3 C10 N2 124.4(4) . . ? 
O3 C10 C9 121.9(4) . . ? 
N2 C10 C9 113.7(4) . . ? 
N3 C11 H111 109.5(3) . . ? 
N3 C11 H112 109.5(4) . . ? 
H111 C11 H112 109.5 . . ? 
N3 C11 H113 109.5(3) . . ? 
H111 C11 H113 109.5 . . ? 
H112 C11 H113 109.5 . . ? 
O4 C12 N3 122.7(5) . . ? 
O4 C12 C13 120.1(5) . . ? 
N3 C12 C13 117.2(4) . . ? 
N2 C13 C12 116.5(4) . . ? 
N2 C13 C14 119.1(4) . . ? 
C12 C13 C14 117.3(4) . . ? 
N2 C13 C15 114.4(4) . . ? 
C12 C13 C15 118.4(4) . . ? 
C14 C13 C15 58.5(4) . . ? 
C15 C14 C13 62.0(3) . . ? 
C15 C14 H141 136.2(3) . . ? 
C13 C14 H141 119.8(3) . . ? 
C15 C14 H142 113.2(3) . . ? 
C13 C14 H142 112.1(3) . . ? 
H141 C14 H142 105.9 . . ? 
C14 C15 C16 125.8(5) . . ? 
C14 C15 C13 59.4(3) . . ? 
C16 C15 C13 125.0(4) . . ? 
C14 C15 H151 126.9(3) . . ? 
C16 C15 H151 102.1(3) . . ? 
C13 C15 H151 112.7(3) . . ? 
C17 C16 C21 117.4(5) . . ? 
C17 C16 C15 120.1(5) . . ? 
C21 C16 C15 122.5(5) . . ? 
C16 C17 C18 123.0(6) . . ? 
C16 C17 H171 118.5(3) . . ? 
C18 C17 H171 118.5(4) . . ? 
C17 C18 C19 118.3(6) . . ? 
C17 C18 H181 120.8(4) . . ? 
C19 C18 H181 120.8(4) . . ? 
C20 C19 C18 119.1(5) . . ? 
C20 C19 H191 120.5(3) . . ? 
C18 C19 H191 120.5(4) . . ? 
C21 C20 C19 121.3(5) . . ? 
C21 C20 H201 119.4(4) . . ? 
C19 C20 H201 119.4(3) . . ? 
C20 C21 C16 120.9(5) . . ? 
C20 C21 H211 119.6(4) . . ? 
C16 C21 H211 119.6(3) . . ? 
Cl1 C22 Cl2 112.2(7) . . ? 
Cl1 C22 H221 109.2(5) . . ? 
Cl2 C22 H221 109.2(5) . . ? 
Cl1 C22 H222 109.2(5) . . ? 
Cl2 C22 H222 109.2(5) . . ? 
H221 C22 H222 107.9 . . ? 
 
loop_ 
 _geom_torsion_atom_site_label_1 
 _geom_torsion_atom_site_label_2 
 _geom_torsion_atom_site_label_3 
 _geom_torsion_atom_site_label_4 
 _geom_torsion 
 _geom_torsion_site_symmetry_1 
 _geom_torsion_site_symmetry_2 
 _geom_torsion_site_symmetry_3 
 _geom_torsion_site_symmetry_4 
 _geom_torsion_publ_flag 
 C5 O1 C4 C1 62.2(8) . . . . ? 
 C5 O1 C4 C3 -177.8(6) . . . . ? 
 C5 O1 C4 C2 -60.3(7) . . . . ? 
 C6 N1 C5 O2 175.7(6) . . . . ? 
 C9 N1 C5 O2 1.0(8) . . . . ? 
 C6 N1 C5 O1 -2.5(7) . . . . ? 
 C9 N1 C5 O1 -177.1(4) . . . . ? 
 C4 O1 C5 O2 -0.7(8) . . . . ? 
 C4 O1 C5 N1 177.4(5) . . . . ? 
 C5 N1 C6 C7 -162.0(6) . . . . ? 
 C9 N1 C6 C7 12.9(7) . . . . ? 
 N1 C6 C7 C8 -30.2(8) . . . . ? 
 C6 C7 C8 C9 36.2(8) . . . . ? 
 C5 N1 C9 C8 -175.7(5) . . . . ? 
 C6 N1 C9 C8 8.9(6) . . . . ? 
 C5 N1 C9 C10 -55.9(6) . . . . ? 
 C6 N1 C9 C10 128.7(5) . . . . ? 
 C7 C8 C9 N1 -27.4(7) . . . . ? 
 C7 C8 C9 C10 -146.7(6) . . . . ? 
 C13 N2 C10 O3 3.9(8) . . . . ? 
 C13 N2 C10 C9 -175.3(4) . . . . ? 
 N1 C9 C10 O3 -48.3(6) . . . . ? 
 C8 C9 C10 O3 65.7(7) . . . . ? 
 N1 C9 C10 N2 130.9(4) . . . . ? 
 C8 C9 C10 N2 -115.2(5) . . . . ? 
 C11 N3 C12 O4 3.8(8) . . . . ? 
 C11 N3 C12 C13 -175.8(5) . . . . ? 
 C10 N2 C13 C12 77.4(6) . . . . ? 
 C10 N2 C13 C14 -72.4(6) . . . . ? 
 C10 N2 C13 C15 -138.6(5) . . . . ? 
 O4 C12 C13 N2 -168.9(5) . . . . ? 
 N3 C12 C13 N2 10.7(7) . . . . ? 
 O4 C12 C13 C14 -18.6(7) . . . . ? 
 N3 C12 C13 C14 161.0(5) . . . . ? 
 O4 C12 C13 C15 48.5(7) . . . . ? 
 N3 C12 C13 C15 -131.9(5) . . . . ? 
 N2 C13 C14 C15 -102.4(5) . . . . ? 
 C12 C13 C14 C15 108.1(5) . . . . ? 
 C15 C13 C14 C15 0.000(1) . . . . ? 
 C13 C14 C15 C16 -113.3(6) . . . . ? 
 C13 C14 C15 C13 0.000(1) . . . . ? 
 N2 C13 C15 C14 110.3(5) . . . . ? 
 C12 C13 C15 C14 -106.3(5) . . . . ? 
 C14 C13 C15 C14 0.000(1) . . . . ? 
 N2 C13 C15 C16 -135.1(5) . . . . ? 
 C12 C13 C15 C16 8.2(7) . . . . ? 
 C14 C13 C15 C16 114.6(6) . . . . ? 
 C14 C15 C16 C17 167.7(6) . . . . ? 
 C13 C15 C16 C17 92.8(7) . . . . ? 
 C14 C15 C16 C21 -15.2(8) . . . . ? 
 C13 C15 C16 C21 -90.1(6) . . . . ? 
 C21 C16 C17 C18 -0.5(9) . . . . ? 
 C15 C16 C17 C18 176.7(6) . . . . ? 
 C16 C17 C18 C19 0.0(11) . . . . ? 
 C17 C18 C19 C20 -0.5(11) . . . . ? 
 C18 C19 C20 C21 1.7(10) . . . . ? 
 C19 C20 C21 C16 -2.3(9) . . . . ? 
 C17 C16 C21 C20 1.7(8) . . . . ? 
 C15 C16 C21 C20 -175.5(5) . . . . ? 
 
_refine_diff_density_max     .248 
_refine_diff_density_min    -.255 
_refine_diff_density_rms     .045 
